# Supplementary material for: Mycoplasma hominis Causes DNA Damage and Cell Death in Primary Human Keratinocytes
Source: MDPI journal article supplement (doi:10.3390/microorganisms10101962), 2022-10-01
Supplement: s1 [file s1]

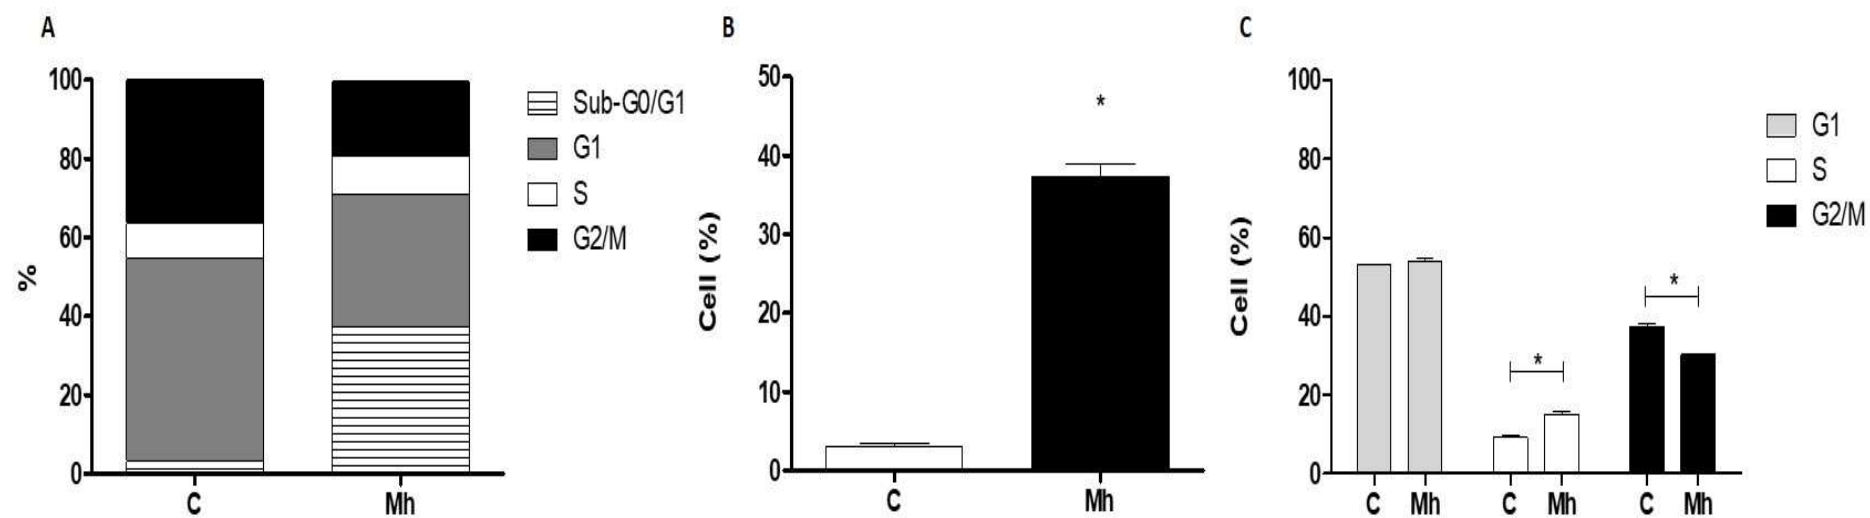

Figure S1: *Mycoplasma hominis* infection affects the progression of the PHK cell cycle after 6 h of infection. Statistical significance ( $p < 0.05$ ) is indicated by an asterisk.
